# Supplementary material for: Synthesis of linear and star-shaped telechelic polyisobutylene by cationic polymerization
Source: Royal Society of Chemistry journal article supplement (doi:10.1039/d2ra04504d), 2022-01-01
Supplement: d2ra04504d1.pdf [file d2ra04504d1.pdf]

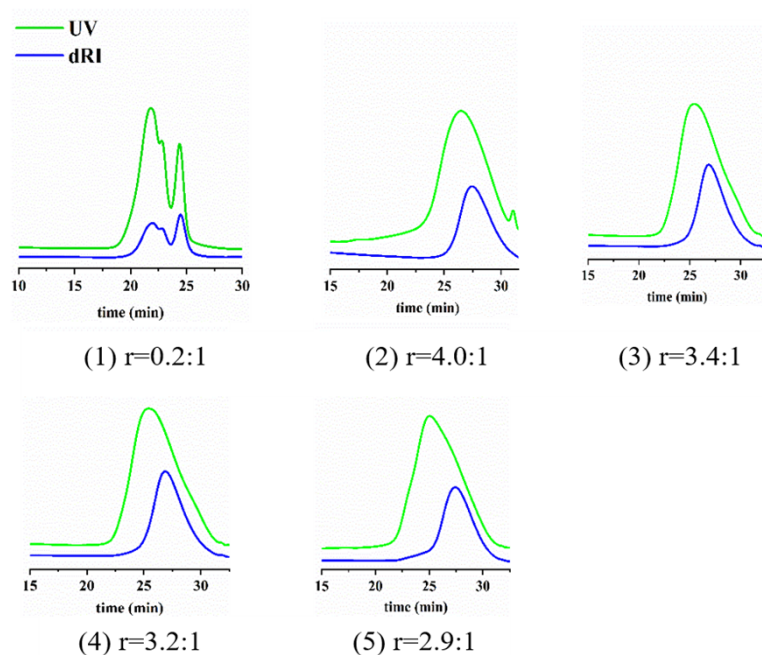

**Figure S1:** Star polymer of UV and RI signal as a function of elution time  
Linking reaction: (1) linking time=60min; (2), (3), (4), (5), linking time=2 min;  $T=-80^{\circ}\text{C}$ ;  
Hex/MeCl=6/4 (v/v)

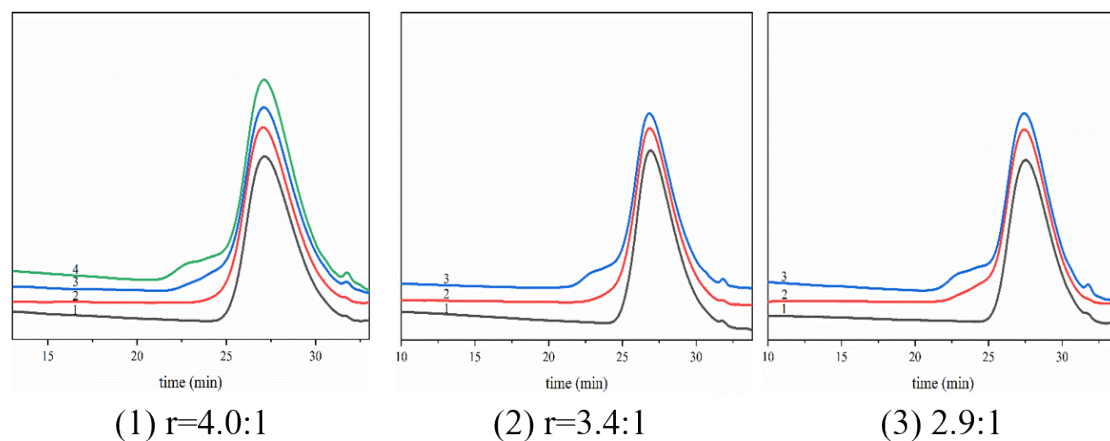

**Figure S2:** RI signal as a function of elution time at different coupling reaction times  
linking time/min: 1-0min, 2-2min, 3-4min, 4-6min;  $T=-80^{\circ}\text{C}$ ; Hex/MeCl=6/4 (v/v)
